# Supplementary material for: Developmental toxicity from exposure to various forms of mercury compounds in medaka fish (Oryzias latipes) embryos
Source: PeerJ. 2016 Aug 23;4:e2282. doi: 10.7717/peerj.2282 (PMC5012308; doi:10.7717/peerj.2282)
Supplement: Table S2 [file peerj-04-2282-s002.xlsx]

## Sheet: Supplementary Table 2
Supplemental Table 2: Mean survival and mortality (±SD) for each concentration of the mercury compounds tested.
		Control					10 M					1 M					0.1 M					0.01 M					0.001 M
Compound	Metric	Replicate 1	Replicate 2	Replicate 3	Mean	SD	Replicate 1	Replicate 2	Replicate 3	Mean	SD	Replicate 1	Replicate 2	Replicate 3	Mean	SD	Replicate 1	Replicate 2	Replicate 3	Mean	SD	Replicate 1	Replicate 2	Replicate 3	Mean	SD	Replicate 1	Replicate 2	Replicate 3	Mean	SD
MeHg	Surviving number	17	9	9	11.6667	4.6188	0	0	0	0	0	0	0	0	0	0	7	7	8	7.33333	0.57735	9	9	8	8.66667	0.57735	10	10	9	9.66667	0.57735
	Mortality	1	1	1	1	0	10	10	10	10	0	10	10	10	10	0	3	3	2	2.66667	0.57735	1	1	2	1.33333	0.57735	0	0	1	0.333333	0.57735
HgCl2	Surviving number	17	9	9	11.6667	4.6188	0	0	0	0	0	7	7	6	6.66667	0.471405	12	7	8	9	2.64575	9	9	8	8.66667	0.57735	10	9	9	9.33333	0.57735
	Mortality	1	1	1	1	0	10	10	10	10	0	3	3	4	3.33333	0.471405	2	3	2	2.33333	0.57735	1	1	2	1.33333	0.57735	0	1	1	0.666667	0.57735
α-HgS	Surviving number	10	9	9	9.33333	0.57735	10	9	9	9.33333	0.57735	10	9	9	9.33333	0.57735	10	9	9	9.33333	0.57735	10	9	9	9.33333	0.57735	10	9	10	9.66667	0.57735
	Mortality	0	1	1	0.666667	0.57735	0	1	1	0.666667	0.57735	0	1	1	0.666667	0.57735	0	1	1	0.666667	0.57735	0	1	1	0.666667	0.57735	0	1	0	0.333333	0.57735
β-HgS	Surviving number	10	9	10	9.66667	0.57735	10	9	10	9.66667	0.57735	10	9	9	9.33333	0.57735	10	9	10	9.66667	0.57735	10	10	10	10	0	10	9	10	9.66667	0.57735
	Mortality	0	1	0	0.333333	0.57735	0	1	0	0.333333	0.57735	0	1	1	0.666667	0.57735	0	1	0	0.333333	0.57735	0	0	0	0	0	0	1	0	0.333333	0.57735
